# Supplementary material for: A functional FePt@MOFs (MIL-101(Fe)) nano-platform for high efficient colorimetric determination of H2O2
Source: Royal Society of Chemistry journal article supplement (doi:10.1039/c9an00307j), 2019-01-01
Supplement: c9an00307j1.pdf [file c9an00307j1.pdf]

# A functional FePt@MOF (MIL-101(Fe)) nano-platform for high efficient colorimetric determination of H<sub>2</sub>O<sub>2</sub>

Zunfu Hu<sup>a</sup>, Yongheng Yin<sup>a</sup>, Qingyun Liu<sup>b</sup>, Xiuwen Zheng<sup>a\*</sup>

a: Key Laboratory of Functional Nanomaterials and Technology in Universities of Shandong, Linyi University,  
Linyi 276000, China

b: School of Chemistry and Environmental Engineering, Shandong University of Science and Technology,  
Qingdao 266510, China

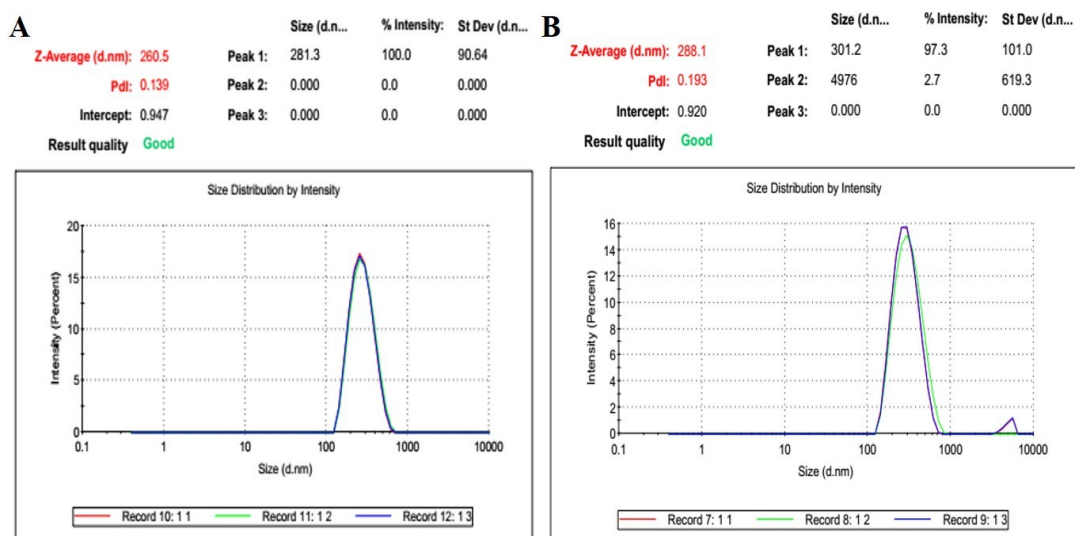

Figure S1. (A) The particles size of the fabricated MOFs; (B) The particle size of FePt@MOFs.

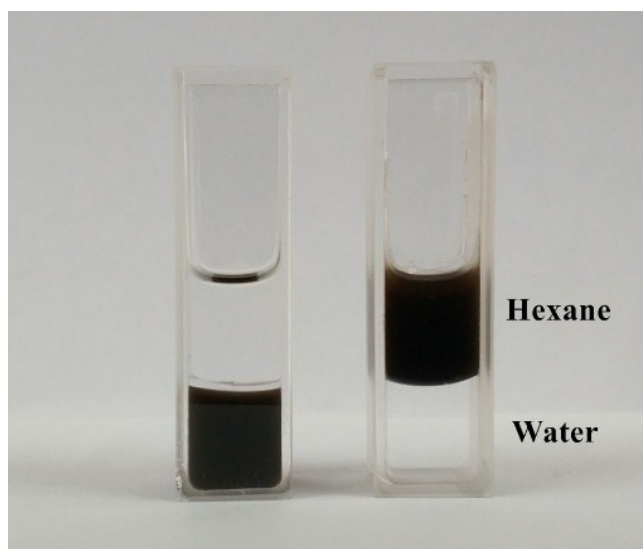

Figure S2. The image of FePt NPs before and after transferred from lipophilic to hydrophilic by DMSA via ligand exchange reaction. For the two phases, the upper layer is n-hexane, the lower is the water.

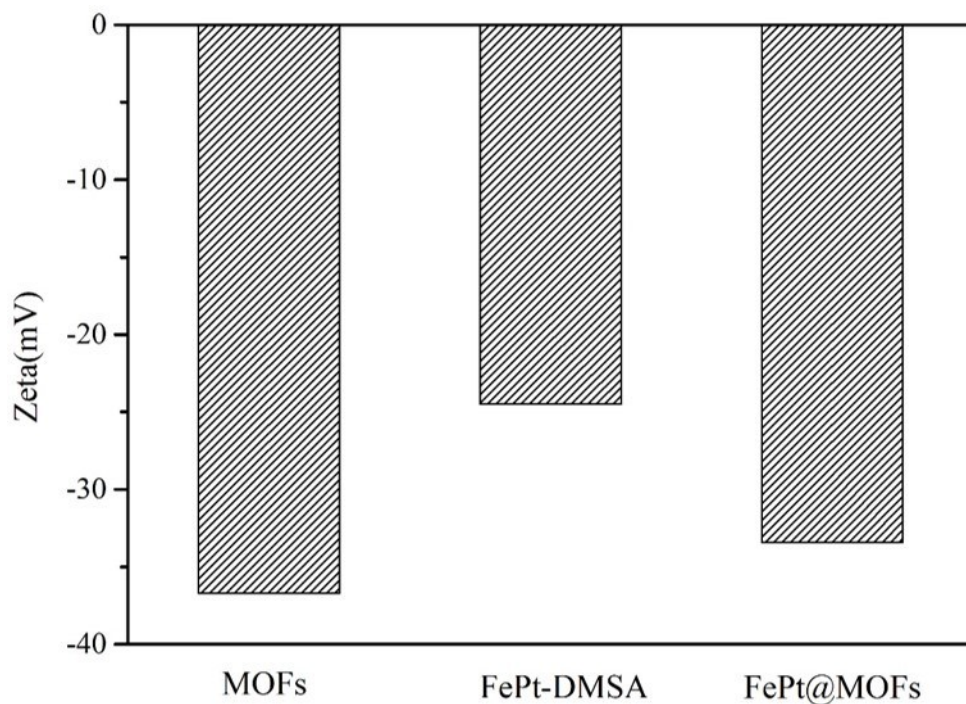

Figure S3. Zeta potential of MOFs, FePt-DMSA and FePt@MOFs.

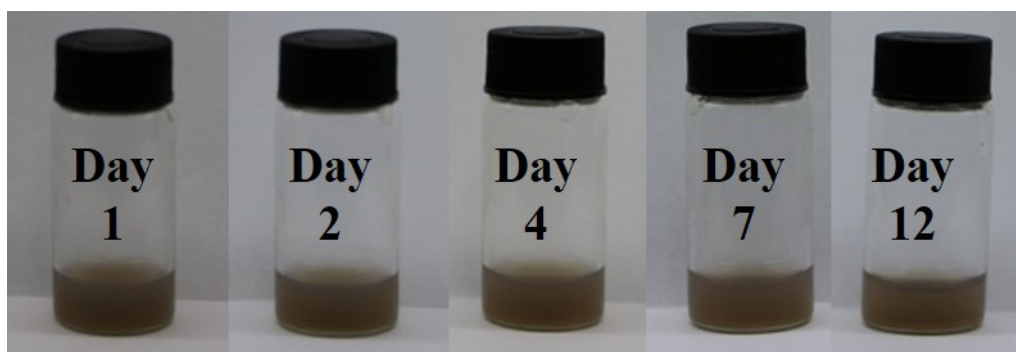

Figure S4. The images of the obtained FePt@MOFs NCs dispersed in water at different times.

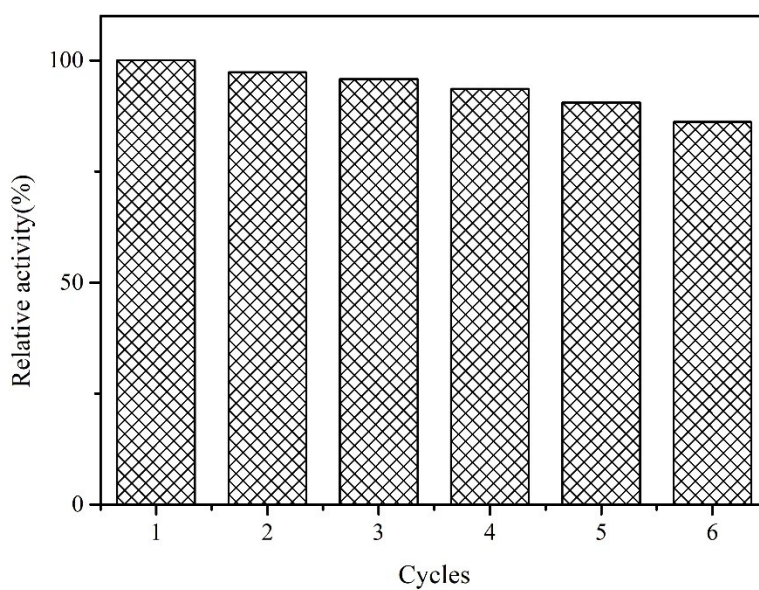

Figure S5. Reusability of catalytic activity of FePt@MOFs NCs.
